# Psychiatric Services

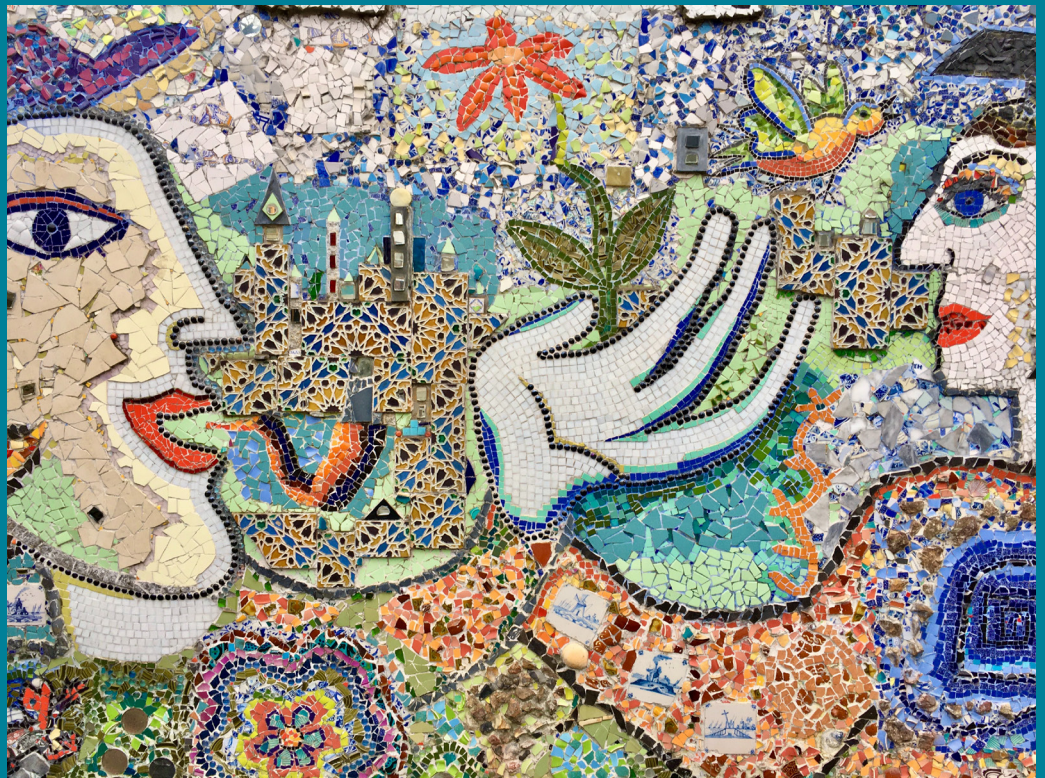

A diversity of beliefs among mental health advocates and activists  
Datapoints: in-state answer rates on National Suicide Prevention Lifeline  
Strengthening review and publication of participatory mental health research  
Renewing the urgency of addressing substance use in psychiatric care
