# Seeking Value

## Balancing Cost and Quality in Psychiatric Care

Edited by Wesley E. Sowers, M.D., and Jules M. Ranz, M.D.

Group for the Advancement of Psychiatry

Health indicators in the United States are among the worst in the developed world, even though its health care system is, by a wide margin, the most expensive in the world. It is a disparity that stems from a fragmentation of services and financial arrangements that often prioritize commercial interests over public health.

*Seeking Value: Balancing Cost and Quality in Psychiatric Care*, a comprehensive volume by the Group for the Advancement of Psychiatry's Mental Health Services Committee, examines the myriad factors that have led to the current state of health care in the United States—starting with an analysis of the meaning and history of value measurement—but it does not stop there. It offers a holistic vision for health care reform, one in which psychiatric professionals play a pivotal role.

A section on system interventions tackles traditional models of financing health care and the role of market forces as it considers broad public health strategies, from elimination of administrative waste to integration of care, that can reduce costs and improve population health, with a special emphasis on the interaction between mental and physical health.

Recognizing that these larger-scale interventions require time to bear fruit, the book also explores the ways the psychiatric profession and individual psychiatrists can contribute to a more skill-diverse, collaborative, activist, value-conscious, and visionary specialty.

Several chapters also identify public policy issues and cultural constructs that go beyond the typical role of clinicians and health care administrators, but that have the potential to impact population health in significant ways, illustrating how different choices could result in remarkable improvements in social well-being. The incorporation of healthy practices in the workplace, efforts to mitigate the impact of climate change, and the elimination of counterproductive incarceration practices all feature in this discussion.

Exhaustive in approach, the book aims to spur thought, conversation, and action to improve value in the services the psychiatric profession provides and the systems in which it operates. Its clear and compelling message will equip readers to develop an advocacy agenda that will resonate with nonmedical stakeholders and the practical strategies needed to see it realized.

# SEEKING VALUE

## Balancing Cost and Quality in PSYCHIATRIC CARE

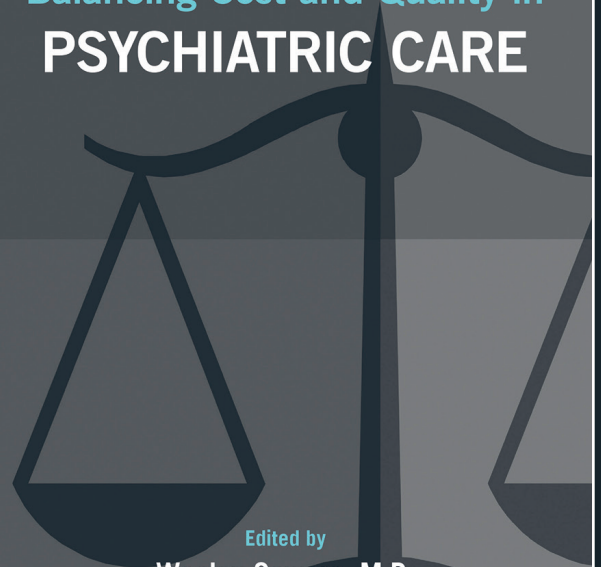

Edited by  
Wesley Sowers, M.D.  
Jules M. Ranz, M.D.

GROUP for the  
ADVANCEMENT of  
PSYCHIATRY

2021 • 643 pages • ISBN 978-0-87318-225-6 • Hardcover • \$85.00 • Item #7225

2021 • 643 pages • ISBN 978-0-87318-226-3 • eBook • \$68.00 • Item #7226

AMERICAN  
PSYCHIATRIC  
ASSOCIATION  
PUBLISHING

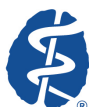

ORDER @ [www.appi.org](http://www.appi.org) | Email: [appi@psych.org](mailto:appi@psych.org) | Toll Free: 1-800-368-5777  
20% Discount for American Psychiatric Association Members  
25% Discount for APA Resident-Fellow Members

Follow us on  and 

AH2232

# PSYCHIATRYonline

Your Destination for Lifelong Learning in Psychiatry

The one-stop resource for information on diagnosis, treatment, guidelines, the latest research, and breaking news from the field.

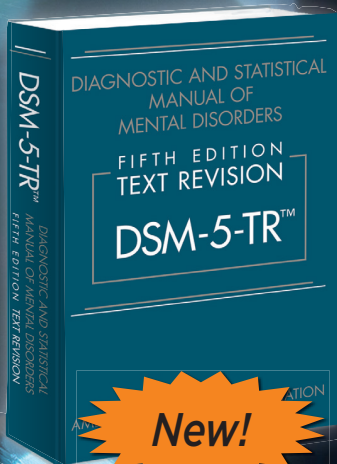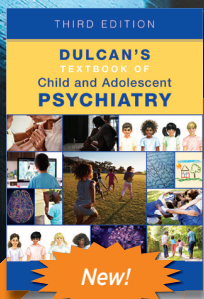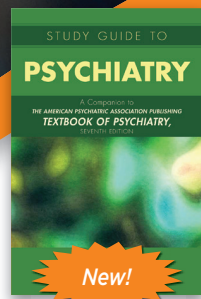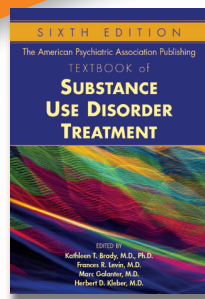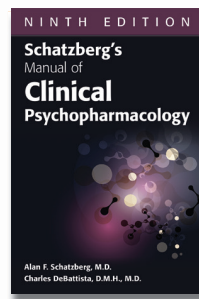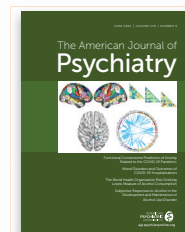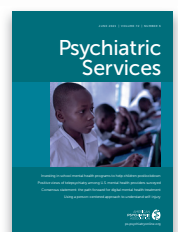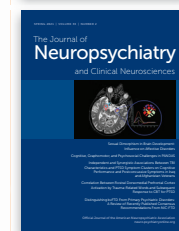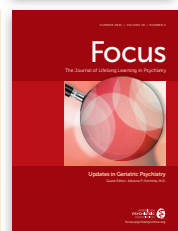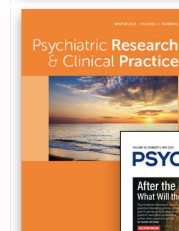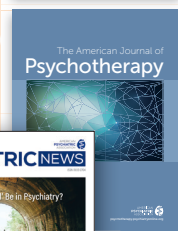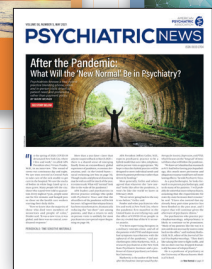

**PsychiatryOnline.org** is the platform for all American Psychiatric Association Publishing journals, *DSM-5-TR™*, and bestselling textbooks, as well as APA Practice Guidelines, and continuing medical education.

This is a one-stop resource for information on psychiatric diagnosis, treatment, guidelines, the latest research, and breaking news from the field. From a single location, users can search across all books and journals to find the most relevant content easier than ever.

Subscribe to products individually or to the DSM Select package that includes the DSM-5® library, books and select journals.

**Go to [www.appi.org](http://www.appi.org) to subscribe.**

*Institutional subscription options are available.*

*For more information contact: [institutions@psych.org](mailto:institutions@psych.org);  
800-368-5777 ext. 3729*

AMERICAN  
PSYCHIATRIC  
ASSOCIATION  
PUBLISHING   
[psychiatryonline.org](http://psychiatryonline.org)

# ▶ PODCASTS from APA Publishing

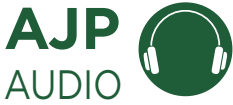

## AJP Audio

Host: Aaron van Dorn

Each episode features an in-depth interview with authors featured in that month's issue of *The American Journal of Psychiatry*.

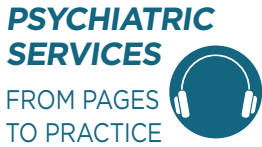

## Psychiatric Services From Pages to Practice

Hosts: Lisa Dixon, M.D., M.P.H., Editor, *Psychiatric Services*, and Josh Berezin, M.D., M.S.

Learn about the latest mental health services research published in *Psychiatric Services* and why it is relevant. Topics include community-based treatment programs, collaborative care, evidence-based treatment and service delivery, criminal and social justice, policy analysis, and more.

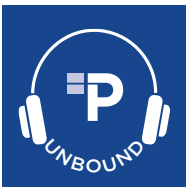

## Psychiatry Unbound

Host: Laura Roberts, M.D., M.A., Editor-in-Chief, APA Publishing Books

APA Publishing's Books podcast offers the opportunity to hear the voices behind the most prominent psychiatric scholarship in the field today. Learn about important topics in the field of psychiatry and see how our authors are making an impact in clinical settings throughout the world.

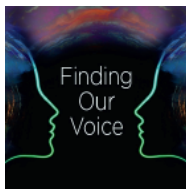

## Finding Our Voice

Host: Sanya Virani, MBBS, MPH

*Finding Our Voice* brings the viewpoints and opinions of the next generation of psychiatrists—including residents, fellows, and early career psychiatrists—to the forefront. Topics covered include systemic racism and social determinants.

Subscribe Today!

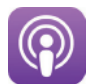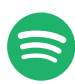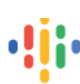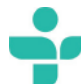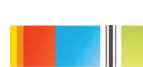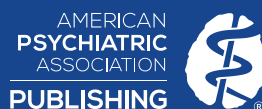



# See and Hear What the Field Is Discussing!

*Psychiatric Services* features research related to the delivery of mental health services, especially for people with serious mental illness in community-based treatment programs. Provision of high-quality care involves collaboration among a variety of professionals. Clinicians, administrators, and policy makers look to *Psychiatric Services* for research on how to deliver evidence-based treatments, to take an integrated “whole-health” approach to care, and to better engage individuals in their care. Mental health’s current focus on patient-centered, recovery-oriented care and on dissemination of evidence-based practices is transforming service delivery systems at all levels. Research published in *Psychiatric Services* contributes to this transformation.

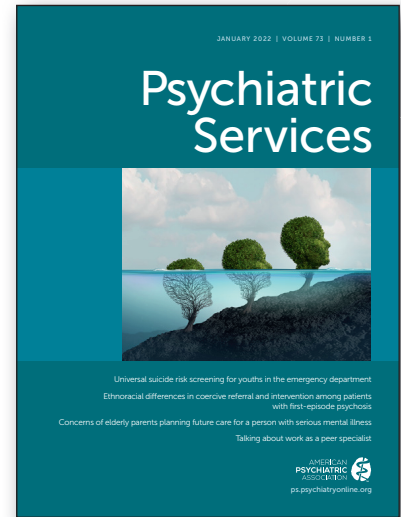

## Our Most Talked About Articles so far in 2022:

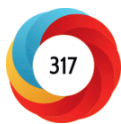

### Mental Health Conservatorship Among Homeless People With Serious Mental Illness

Published online Oct. 27, 2021

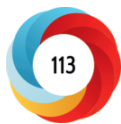

### Addiction Treatment and Telehealth: Review of Efficacy and Provider Insights During the COVID-19 Pandemic

Published online Oct 13, 2021

## The Discussion Continues: *Psychiatric Services*' Podcast “From Pages to Practice”

Editor Lisa Dixon, M.D., M.P.H., and Podcast Editor and co-host Josh Berezin, M.D., M.S., discuss the latest mental health services research published in *Psychiatric Services* and why it is relevant. Topics include community-based treatment programs, collaborative care, evidence-based treatment and service delivery, criminal and social justice, policy analysis, and more.

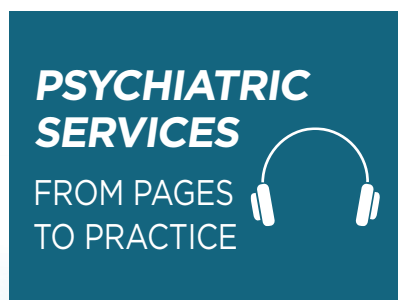

### Cops, Clinicians, or Both? Collaborative Approaches to Responding to Behavioral Health Emergencies

Margaret E. Balfour, M.D., Ph.D., and Sgt. Jason Winsky look at collaborations between police and clinicians in the treatment of mental health and behavioral health emergencies.

### Implementation Potential of Moral Reconciliation Therapy for Criminal Recidivism in Mental Health Residential Programs

Daniel M. Blonigen, Ph.D., discusses implementing moral reconciliation therapy in a noncorrectional setting among justice-involved veterans receiving residential mental health treatment with an aim towards reducing criminal recidivism.
